Distinct cellular and molecular mechanisms mediate initial axon development and adult-stage axon regeneration in *C. elegans*

**Christopher V. Gabel, Faustine Antoine, Chiou-Fen Chuang, Aravinthan D. T. Samuel and Chieh Chang**

There was an error published in *Development* **135**, 1129-1136.

The name of author Faustine Antoine was misspelt and appears correctly above.

The authors apologise to readers for this mistake.
